# Supplementary material for: LncRNA MNX-AS1 combined with YBX1 to promote bladder cancer proliferation, migration, and invasion through activiting Wnt signaling pathway
Source: Research Square preprint supplement (doi:10.21203/rs.3.rs-64840/v1), 2021-01-18
Supplement: Supplementary file 1 [file 38bb81c78967e74dc8982eee.docx]

**Supplementary Figure Legends**

**Figure S1. MNX1-AS1 promotes bladder cancer cell survival, invasion and migration along with YBX1.** (A) qRT-PCR analysis the expressing of MNX1-AS1 in stable expressed MNX1-AS1 sgRNA in HTB-1 cells, **P<0.01, one-way ANOVA. (B) Colony number of Figure 3I. Each bar represents the mean ± S.D. for biological triplicate experiments. ** P<0.01, one-way ANOVA. (C) Colony number of Figure 3K, Each bar represents the mean ± S.D. for biological triplicate experiments. ** P<0.01, one-way ANOVA.

**Figure S2. MNX1-AS1 combined with YBX1 to regulate WNT signaling pathway.** (A) HTB-1 cells were stably transfected with control shRNA or YBX1 shRNA and examined the expression of β-catenin, c-Myc, PYGO1, LGR5, AXIN2 and WNT1 genes by qRT-PCR assays. Each bar represents the mean ± S.D. for biological triplicate experiments. **P<0.01, one-way ANOVA. (B) HTB-1 cells were stably transfected with control sgRNA or MNX1-AS1 sgRNA and examined the expression of β-catenin, c-Myc, PYGO1, LGR5, AXIN2 and WNT1 genes by qRT-PCR assays. Each bar represents the mean ± S.D. for biological triplicate experiments. **P<0.01, one-way ANOVA.

**Figure S3. MNX1-AS1 promote WNT signaling pathway through mediate YBX1 binding to the promoter of β-catenin.** (A) qRT-PCR analysis the expression of MNX1-AS1 gene in T24 cells. Each bar represents the mean ± S.D. for biological triplicate experiments. **P<0.01, one-way ANOVA. (B) Stably expressed Flag-YBX1 T24 cells were transfected with control ASO or MNX1-AS1 ASO and cultured in the absence or presence of 25 m M LiCl for 6 h before followed by ChIP assays. Indicated gene primer were used. Each bar represents the mean ± S.D. for biological triplicate experiments. NS: nonsense. **P<0.01, one-way ANOVA.
